# Supplementary material for: Antioxidant Effects of Argan Oil and Olive Oil against Iron-Induced Oxidative Stress: In Vivo and In Vitro Approaches
Source: MDPI journal article supplement (doi:10.3390/molecules28155924), 2023-08-07
Supplement: s1 [file s1]

## Rapport d'analyses

### Section Corps Gras

L'etablissement N° 13, zone industrielle, Tassila, Agadir, Maroc. Tél. : 212 (520) 32 20 17. Site web : <http://web2.ence.org.ma>. Email : [ence@ence.org.ma](mailto:ence@ence.org.ma)

Echantillon : 2017-04408

Dénomination : HUILE ARGANE TORREFIEE  
Description : Deux bouteilles en verre de 250ml fermées  
Numéro de Prélèvement : 337/17  
Demande d'analyse : 1708003769  
Producteur : EFAS  
Exportateur : EFAS  
Fabricant ou conditionneur : EFAS  
Destination : UNION EUROPEENNE  
Date Fabrication : ---

Date Conditionnement : ---  
Section : Corps Gras.  
Marque : ---  
Lot : A01/17  
Client : Délégation Agadir PV  
Emballage : BOUTEILLE EN VERRE  
Date de prélèvement : 03-08-2017  
Date d'entrée : 04-08-2017  
Date de fin d'analyse : 12-08-2017

|                                                | LO | Résultat | Unité                     | Incertitude | Normes | Méthode                                                                                             |
|------------------------------------------------|----|----------|---------------------------|-------------|--------|-----------------------------------------------------------------------------------------------------|
| Absorbance dans l'Ultra violet (K1% 1cm)*      |    |          |                           |             |        | NF EN ISO 3656, COI T.20 Doc n°19                                                                   |
| Absorbance (K) à 270nm                         | *  | 0,13     |                           |             |        |                                                                                                     |
| Delta K                                        | *  | 0,003    |                           |             |        |                                                                                                     |
| Composition en acides gras*                    |    |          |                           |             |        | NF EN ISO 12966-3 (Méthode transméthylation en conditions de catalyse alcalines), NF EN ISO 12966-4 |
| ACIDE MYRISTIQUE (C14:0)                       | *  | 0,1      | %                         |             |        |                                                                                                     |
| ACIDE PENTADECANOIQUE (C15:0)                  | *  | <0,1     | %                         |             |        |                                                                                                     |
| ACIDE PALMITIQUE (C16:0)                       | *  | 12,6     | %                         |             |        |                                                                                                     |
| ACIDE PALMITOLEIQUE (C16:1)                    | *  | 0,2      | %                         |             |        |                                                                                                     |
| ACIDE MARGARIQUE (C17:0)                       | *  | 0,1      | %                         |             |        |                                                                                                     |
| ACIDE HEPTADECANOIQUE (C17:1)                  | *  | <0,1     | %                         |             |        |                                                                                                     |
| ACIDE STEARIQUE (C18:0)                        | *  | 5,8      | %                         |             |        |                                                                                                     |
| ACIDE OLEIQUE (C18:1)                          | *  | 46,3     | %                         |             |        |                                                                                                     |
| ACIDE LINOLEIQUE (C18:2)                       | *  | 34,0     | %                         |             |        |                                                                                                     |
| ACIDE LINOLENIQUE (C18:3)                      | *  | 0,1      | %                         |             |        |                                                                                                     |
| ACIDE ARACHIDIQUE (C20:0)                      | *  | 0,3      | %                         |             |        |                                                                                                     |
| ACIDE GADOLEIQUE (C20:1)                       | *  | 0,3      | %                         |             |        |                                                                                                     |
| ACIDE BEHENIQUE (C22:0)                        | *  | 0,1      | %                         |             |        |                                                                                                     |
| Acidité libre % exprimée en acide oléique*     |    |          |                           |             |        | NF EN ISO 660 (Méthode au solvant & froid utilisant un indicateur)                                  |
| ACIDITE LIBRE                                  | *  | 0,22     | %                         |             |        |                                                                                                     |
| Teneur en eau et matières volatiles*           |    |          |                           |             |        | NF EN ISO 662 (Méthode B)                                                                           |
| Teneur en eau et en matières volatiles (12/12) | *  | 0,02     | %                         |             |        |                                                                                                     |
| Indice de peroxyde (mEqO2 actif par Kg)*       |    |          |                           |             |        | ISO 3960                                                                                            |
| Indice de peroxyde en milléquiv. O2/kg         | *  | 2,1      | meq/o2<br>actif par<br>kg |             |        |                                                                                                     |

Ce rapport d'analyse est destiné au client cité ci-dessus. Il ne peut être reproduit, sinon en entier, sans autorisation écrite du responsable Laboratoire Agadir

Page 1 / 2

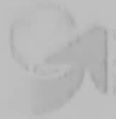

## Rapport d'analyses

### Section Corps Gras

Lieulement n° 13, zone industrielle, Tassila, Agadir, Maroc, Tél : 212 (520) 32 20 17, Site web : <http://web2.eacce.org.ma>, Email : [eacce@eacce.org.ma](mailto:eacce@eacce.org.ma)

Echantillon : 2017-04408

Conclusion au vu des analyses effectuées :

Résultats ne se rapportent qu'à l'échantillon soumis à l'essai

Edité le : 12/08/2017

Accréditation du COFRAC atteste de la compétence du laboratoire pour les seules déterminations couvertes par l'accréditation qui sont identifiées par le symbole :

Responsable de la Section

Yassine EL ALEM

Responsable du Laboratoire

Lhoucine BAZZI

Responsable du Laboratoire d'Analyses  
Physico-Chimiques AGADIR  
  
Lhoucine BAZZI
