# Supplementary material for: Antioxidant Effects of Argan Oil and Olive Oil against Iron-Induced Oxidative Stress: In Vivo and In Vitro Approaches
Source: MDPI journal article supplement (doi:10.3390/molecules28155924), 2023-08-07
Supplement: s1 [file s1]

## Rapport d'analyses

### Laboratoire d'analyses physicochimiques-Section Corps Gras

Qualipôle, Agropolis de Meknès, Tél : +212 6 18 53 22 43, Site web : <http://www.eacce.org.ma>, Email : [eacce@eacce.org.ma](mailto:eacce@eacce.org.ma)

Echantillon : 2017-07493

#### INFORMATIONS CLIENT

Demande d'analyse : 1712006367  
Dénomination : **HUILE OLIVE EXTRA VIERGE**  
Description : DEUX BOUTEILLES DE 250 ml EN PLASTIQUE FERMEES  
Numéro de Prélèvement : 204/17F  
Date de prélèvement : 21-12-2017  
Exportateur : HUILE DE SEFROU  
Fabricant ou conditionneur : HUILE DE SEFROU  
Producteur : GIE HUILE DE SEFROU  
Date Conditionnement : ---  
Date Fabrication : ---  
Marque : ---  
Lot : 2 PEV 2011-2016  
Destination : UNION EUROPEENNE  
Emballage : .  
Client : Délégation Fès

#### INFORMATIONS LABORATOIRE

Section : Corps Gras..  
Date d'entrée : 03-01-2018  
Date d'exécution : 03-01-2018  
Date de fin d'analyse : 09-01-2018

|                                                 | LQ | Résultat | Unité              | Incertitude | Normes           | Méthode                          |
|-------------------------------------------------|----|----------|--------------------|-------------|------------------|----------------------------------|
| ACIDITE(EN %ACIDE OLEIQUE)*                     |    |          |                    |             |                  | NF EN ISO 660                    |
| Acidité (En % Acide Oléique) *                  |    | 0,28     | %                  |             | <= 0,8           |                                  |
| INDICE DE PEROXYDE*                             |    |          |                    |             |                  | ISO 3960                         |
| Indice de peroxyde en milliéquivalent O2/kg *   |    | 3,2      | meq/o2a<br>ctif/Kg |             | <= 20            |                                  |
| EXTINCTION SPECIFIQUE A 232nm                   |    |          |                    |             |                  | ISO 3656 /COI/T.20/DOC.N°19      |
| Extinction Spécifique à 232 nm                  |    | 1,71     |                    |             | <= 2,50          |                                  |
| EXTINCTION SPECIFIQUE A 270nm                   |    |          |                    |             |                  | ISO 3656 /COI/T.20/DOC.N°19      |
| Extinction Spécifique à 270 nm                  |    | 0,15     |                    |             | <= 0,22          |                                  |
| DELTA K                                         |    |          |                    |             |                  | ISO 3656 /COI/T.20/DOC.N°19      |
| Delta K                                         |    | 0,00     |                    |             | <= 0,01          |                                  |
| TENEUR EN EAU ET EN MATIERES VOLATILES*         |    |          |                    |             |                  | NF EN ISO 662                    |
| Teneur en eau et en matières volatiles (M/M) *  |    | 0,13     | %                  |             | <= 0,2           |                                  |
| Analyse des esters méthyliques des acides gras* |    |          |                    |             |                  | ISO 12966-2 ET NF EN ISO 12966-4 |
| ACIDE MYRISTIQUE (C14:0) *                      |    | 0,0      | %                  |             | <= 0,03          |                                  |
| ACIDE PALMITIQUE (C16:0) *                      |    | 9,7      | %                  |             | >= 7,50 <= 20,00 |                                  |
| ACIDE PALMITOLEIQUE (C16:1) *                   |    | 0,5      | %                  |             | >= 0,30 <= 3,50  |                                  |
| ACIDE MARGARIQUE (C17:0) *                      |    | 0,0      | %                  |             | <= 0,40          |                                  |

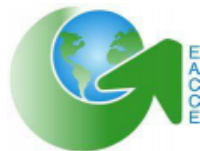

## Rapport d'analyses

### Laboratoire d'analyses physicochimiques-Section Corps Gras

Qualipôle, Agropolis de Meknès, Tél : +212 6 18 53 22 43, Site web : <http://www.eacce.org.ma>, Email : [eacce@eacce.org.ma](mailto:eacce@eacce.org.ma)

Echantillon : 2017-07493

|                                                      |   |  |      |   |  |                   |                                  |
|------------------------------------------------------|---|--|------|---|--|-------------------|----------------------------------|
| ACIDE HEPTADECENOIQUE (C17:1)                        | * |  | 0,1  | % |  | <= 0,60           |                                  |
| ACIDE STEARIQUE (C18:0)                              | * |  | 2,6  | % |  | >= 0,50 <= 5,00   |                                  |
| ACIDE OLEIQUE (C18:1)                                | * |  | 73,6 | % |  | >= 55,00 <= 83,00 |                                  |
| ACIDE LINOLEIQUE (C18:2)                             | * |  | 11,3 | % |  | >= 2,50 <= 21,00  |                                  |
| ACIDE LINOLENIQUE (C18:3)                            | * |  | 1,0  | % |  | <= 1,00           |                                  |
| ACIDE ARACHIDIQUE (C20:0)                            | * |  | 0,3  | % |  | <= 0,60           |                                  |
| ACIDE GADOLEIQUE (C20:1)                             | * |  | 0,4  | % |  | <= 0,50           |                                  |
| ACIDE BEHENIQUE (C22:0)                              | * |  | 0,1  | % |  | <= 0,20           |                                  |
| ACIDE LIGNOCERIQUE (C24:0)                           | * |  | 0,2  | % |  | <= 0,20           |                                  |
| AUTRE                                                | * |  | 0,1  | % |  |                   |                                  |
| Analyse des esters méthyliques des acides gras trans |   |  |      |   |  |                   | ISO 12966-2 ET NF EN ISO 12966-4 |
| C 18 : 1 TRANS                                       |   |  | 0,02 | % |  | <= 0,05           |                                  |
| C18:2 Trans + C18:3 Trans en %                       |   |  | 0,04 | % |  | <= 0,05           |                                  |



## Rapport d'analyses

### Laboratoire d'analyses physicochimiques-Section Corps Gras

Qualipôle, Agropolis de Meknès, Tél : +212 6 18 53 22 43, Site web : <http://www.eacce.org.ma>, Email : [eacce@eacce.org.ma](mailto:eacce@eacce.org.ma)

Echantillon : 2017-07493

Conclusion au vu des analyses effectuées : ECHANTILLON CONFORME AUX NORMES EN VIGUEUR DU CONSEIL OLEICOLE INTERNATIONAL SANS TENIR COMPTE DE L'INCERTITUDE ASSOCIÉE AUX RÉSULTATS.

Les résultats ne se rapportent qu'à l'échantillon soumis à l'essai

Edité le : 08/06/2023

L'accréditation du COFRAC atteste de la compétence du laboratoire pour les seules déterminations couvertes par l'accréditation qui sont identifiées par le symbole : \*

#### Responsable de la Section

Sofia EL MARJANY

#### Responsable du Laboratoire

Ahmed SMIHROU
